# Supplementary material for: In situ photodeposition of platinum clusters on a covalent organic framework for photocatalytic hydrogen production
Source: PubMed Central journal article supplement (PMC8924255; doi:10.1038/s41467-022-29076-z), 2022-03-15
Supplement: 41467_2022_29076_MOESM1_ESM.pdf [file 41467_2022_29076_MOESM1_ESM.pdf]

## Supplementary Information

### **In situ photodeposition of platinum clusters on a covalent organic framework for photocatalytic hydrogen production**

Yimeng Li<sup>1#</sup>, Li Yang<sup>1#</sup>, Huijie He<sup>1</sup>, Lei Sun<sup>1</sup>, Honglei Wang<sup>1</sup>, Xu Fang<sup>1</sup>, Yanliang Zhao<sup>1</sup>, Daoyuan Zheng<sup>1</sup>, Yu Qi<sup>2</sup>, Zhen Li<sup>1\*</sup> and Weiqiao Deng<sup>1,2\*</sup>

- 1、 Institute of Molecular Sciences and Engineering, Institute of Frontier and Interdisciplinary Science, Shandong University, Qingdao, Shandong, 266237, China.
- 2、 Dalian National Laboratory for Clean Energy, Dalian Institute of Chemical Physics, Chinese Academy of Sciences, Dalian 116023, China

\* Corresponding author, E-mail: zhen\_li@sdu.edu.cn; dengwq@sdu.edu.cn

# These authors contributed equally to this work.

## Section I: supplementary Figures and Tables.

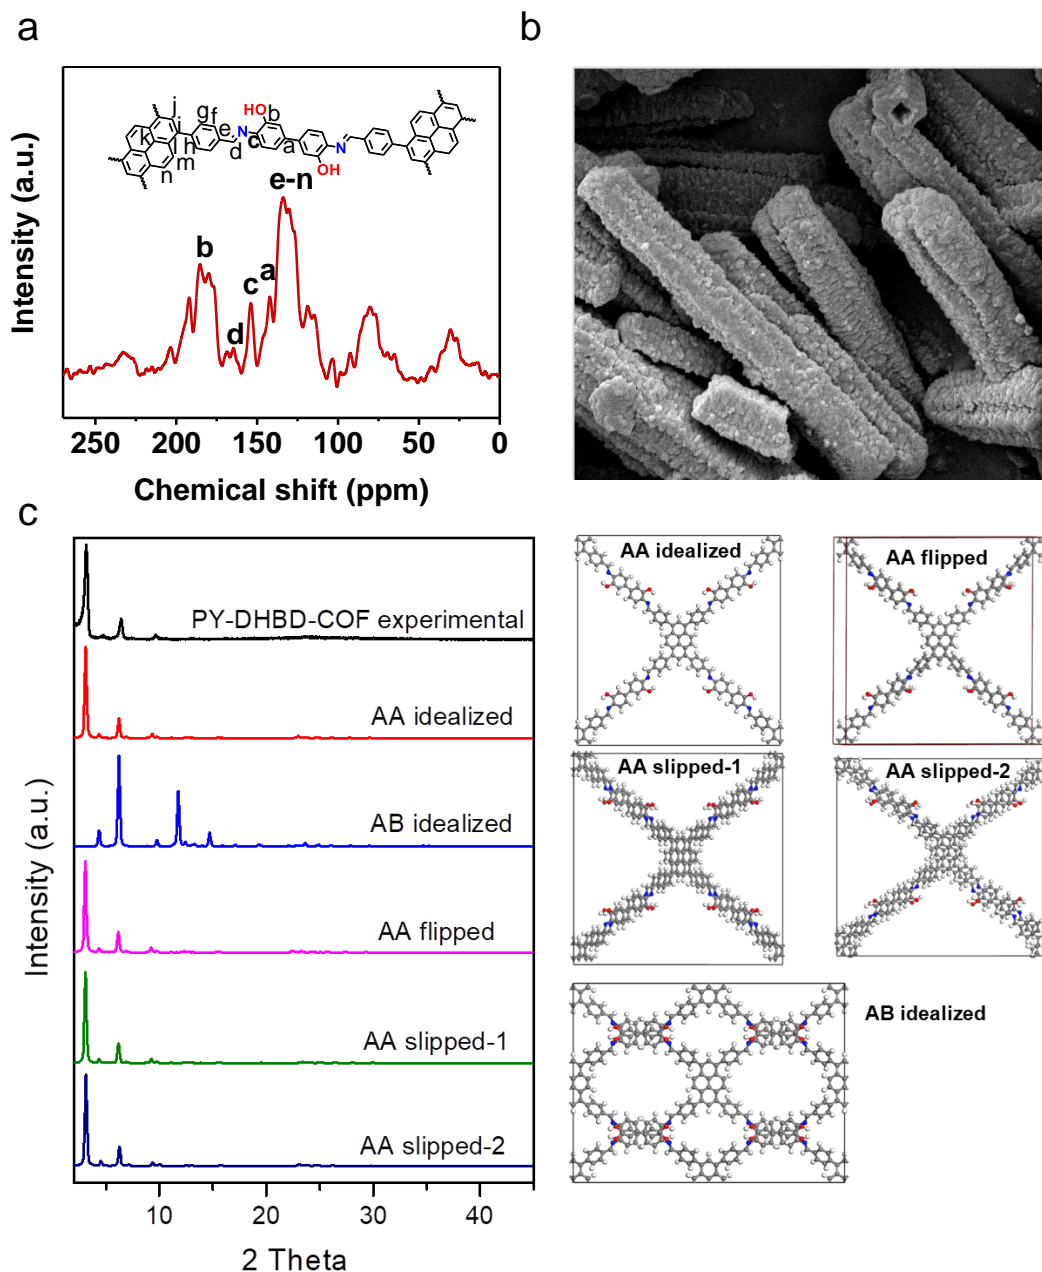

**Supplementary Figure 1.** Structural characterizations and morphology of PY-DHBD-COF. **(a)** Solid state  $^{13}\text{C}$ -NMR spectrum of PY-DHBD-COF. **(b)** SEM image of PY-DHBD-COF. **(c)** Comparison of experimental and simulated powder X-ray diffraction patterns of several possible stacking models of PY-DHBD-COF including AA idealized, AB idealized, AA flipped, AA slipped-1 (with offset of 1.44 Å in the (110) direction) and AA slipped-2 (with offset of 2.88 Å in the (110) direction).

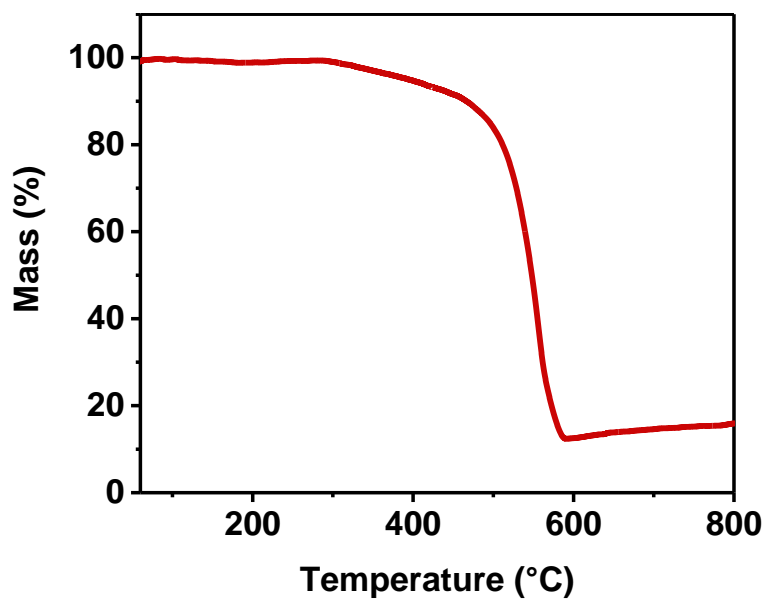

Supplementary Figure 2. TGA profile for PY-DHBD-COF.

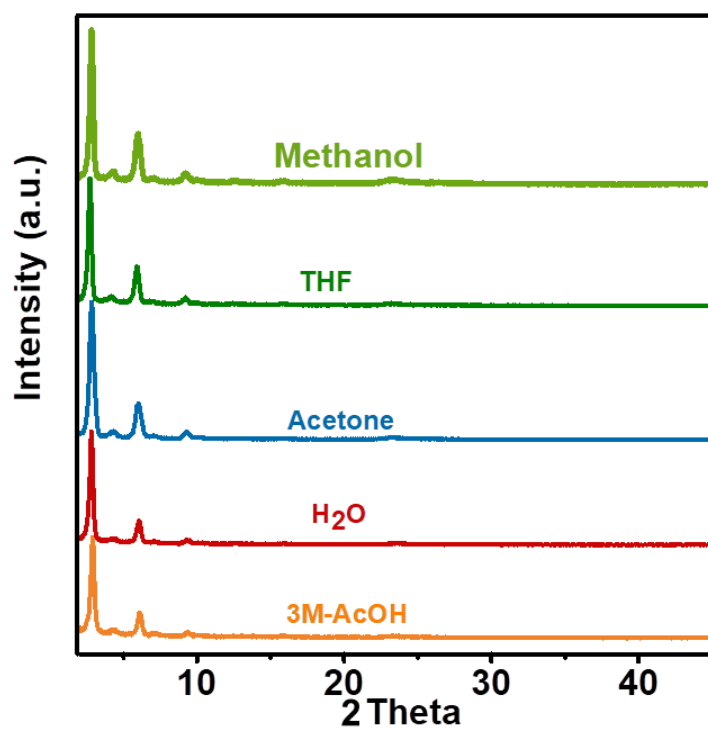

Supplementary Figure 3. PXRD patterns of the PY-DHBD-COF samples after soaking in different solvents

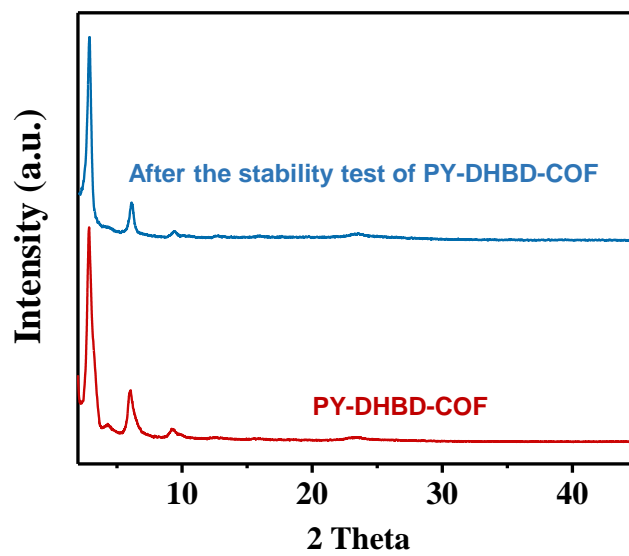

**Supplementary Figure 4.** PXRD patterns of PY-DHBD-COF before and after the long-term stability test.

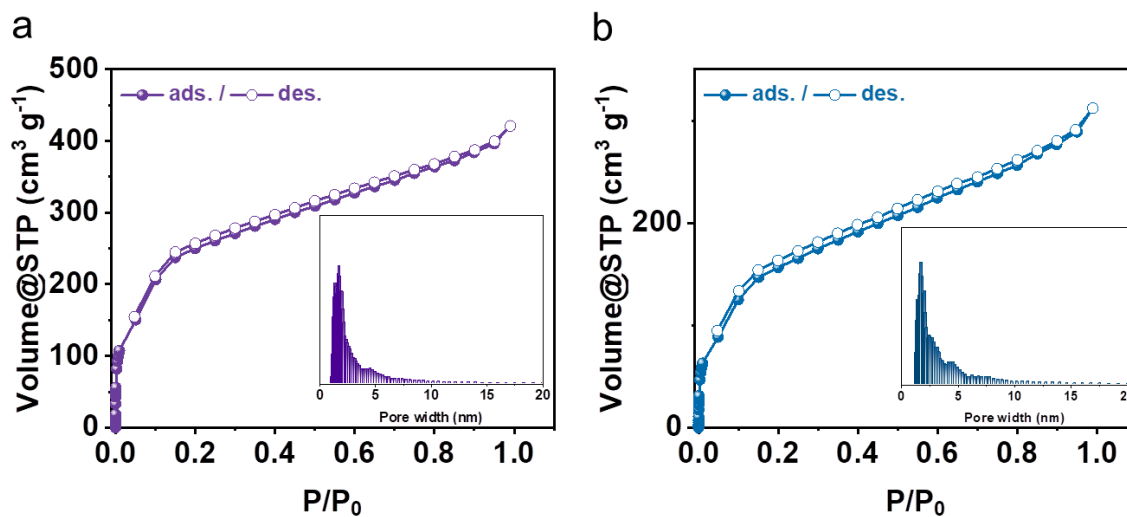

**Supplementary Figure 5.** N<sub>2</sub> adsorption isotherms of 3wt%-Pt-PY-DHBD-COF. (a) N<sub>2</sub> adsorption isotherms of 3wt%-Pt-PY-DHBD-COF before the long-term stability test. (b) N<sub>2</sub> adsorption isotherms of 3wt%-Pt-PY-DHBD-COF after the long-term stability test. Insert: pore size distributions.

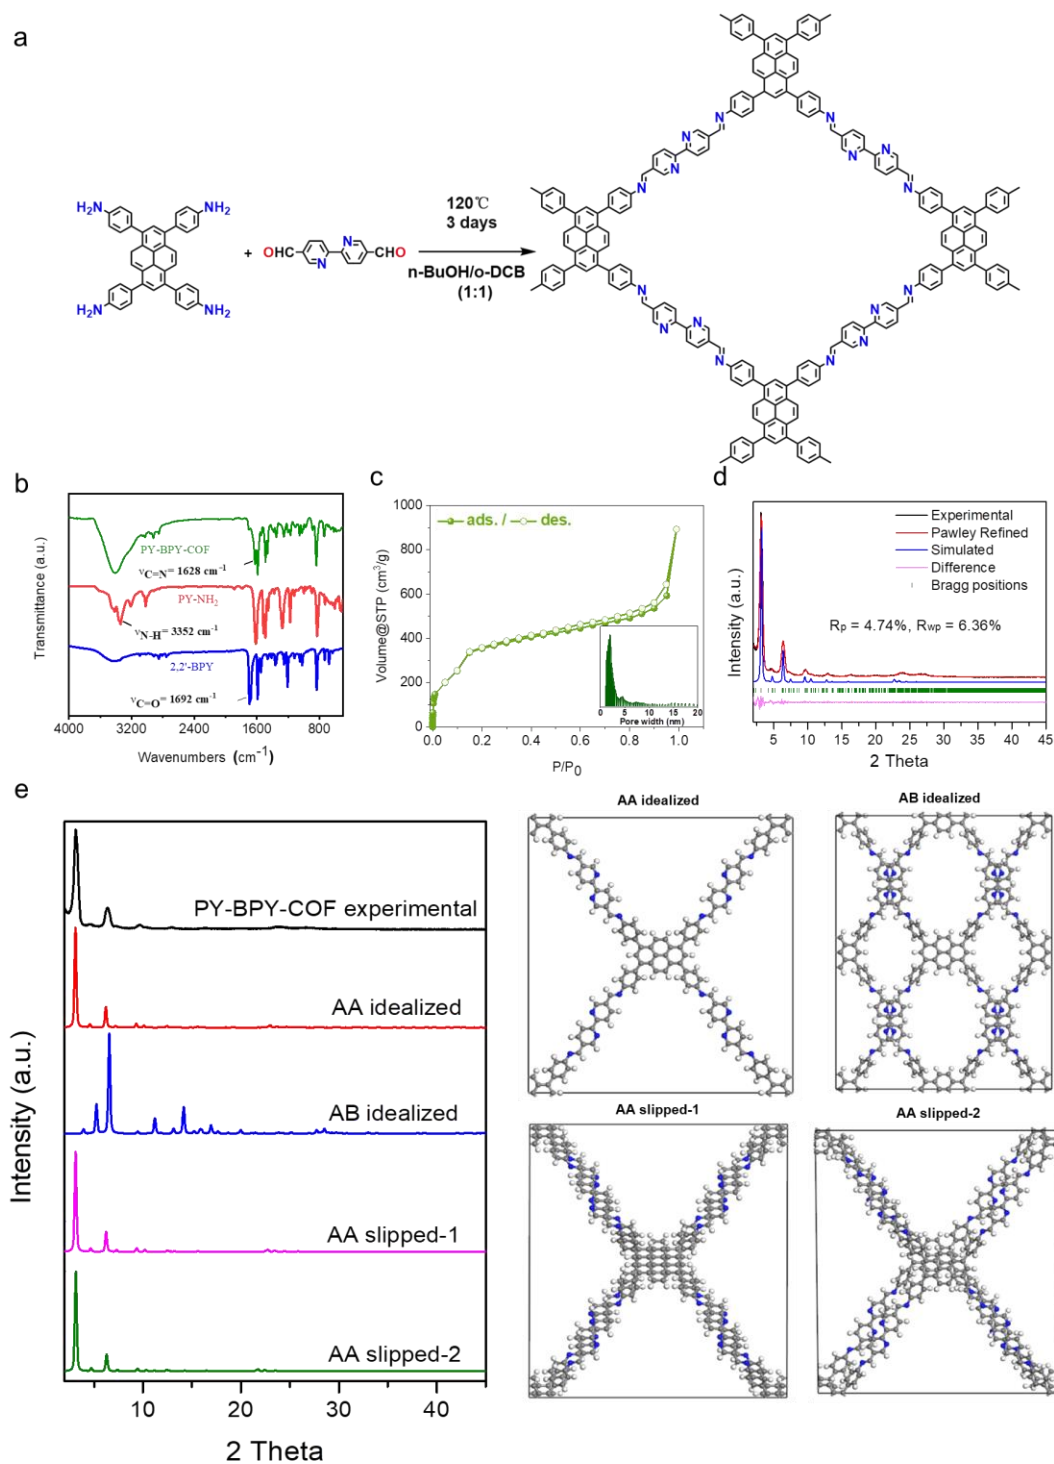

**Supplementary Figure 6.** Synthesis and characterizations of PY-BPY-COF. (a) Synthesis process and structure of PY-BPY-COF. (b) FT-IR spectra of PY-BPY-COF and the building monomers. (c) N<sub>2</sub> adsorption isotherms of PY-BPY-COF. (d) Experimental and simulated PXRD patterns of PY-BPY-COF. (e) Comparison of experimental and simulated powder X-ray

diffraction patterns of several possible stacking models of PY-BPY-COF including AA idealized, AB idealized, AA slipped-1 (with offset of 1.44 Å in the (110) direction) and AA slipped-2 (with offset of 2.88 Å in the (110) direction).

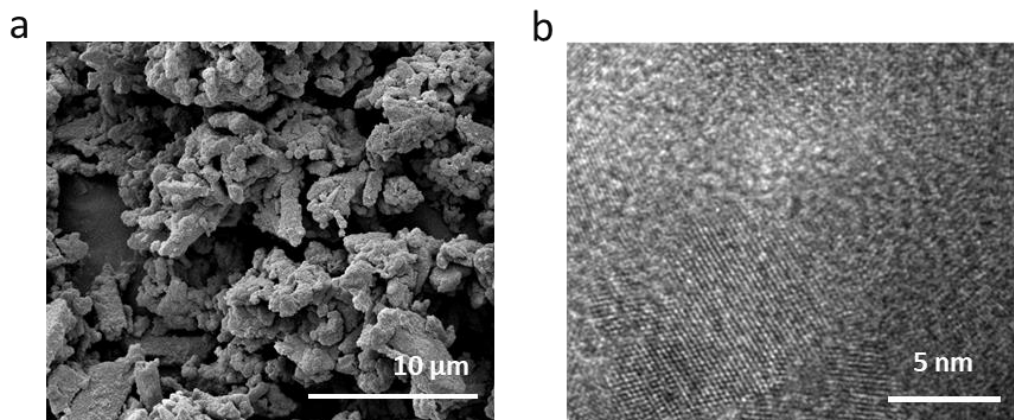

**Supplementary Figure 7.** Morphologies of PY-BPY-COF. (a) SEM images of PY-BPY-COF. (b) HR-TEM images of PY-BPY-COF.

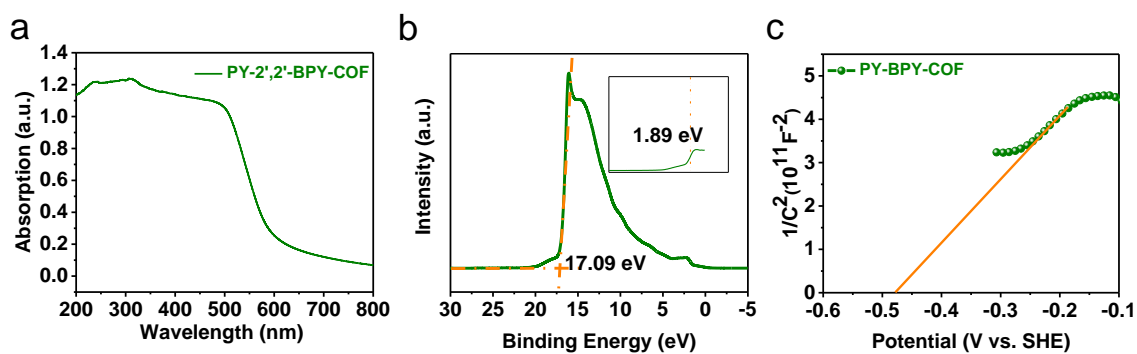

**Supplementary Figure 8.** Optical and electronic properties of PY-BPY-COF. (a) UV-Vis diffuse reflectance spectrum of PY-BPY-COF. (b) UPS spectrum of PY-BPY-COF. (c) Mott-Schottky plot of PY-BPY-COF.

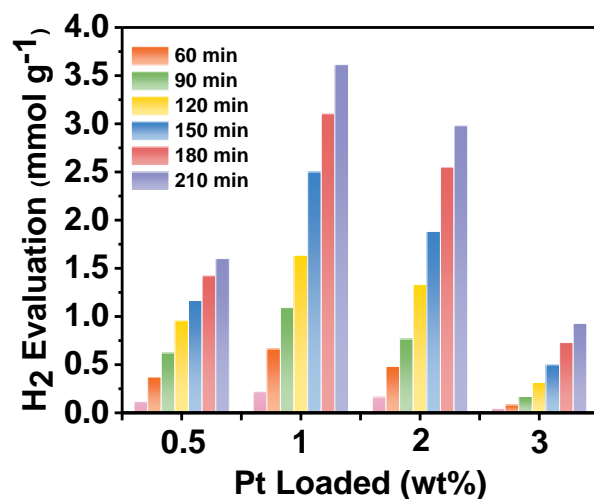

**Supplementary Figure 9.** Time dependent hydrogen evolution for PY-BPY-COF with different Pt loading amount. (10 mg catalyst was dispersed in 100 mL water, 10 mM ascorbic acid as electron donor,  $\text{H}_2\text{PtCl}_6$  ( $0.376 \text{ g Pt L}^{-1}$ ) as Pt precursor, 300 W Xe lamp,  $\lambda > 420 \text{ nm}$ ).

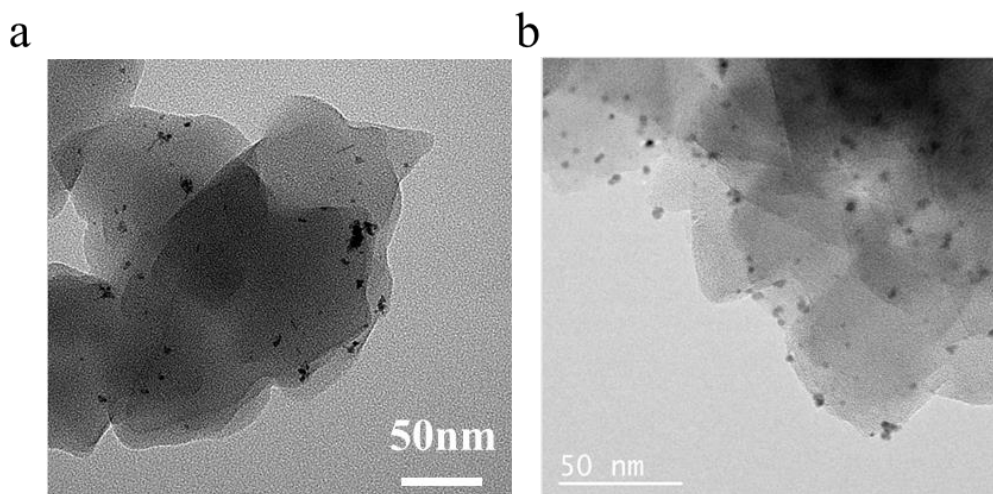

**Supplementary Figure 10.** TEM images of Pt-PY-BPY-COF. (a) 0.5 wt% Pt loading. (b) 1 wt% Pt loading.

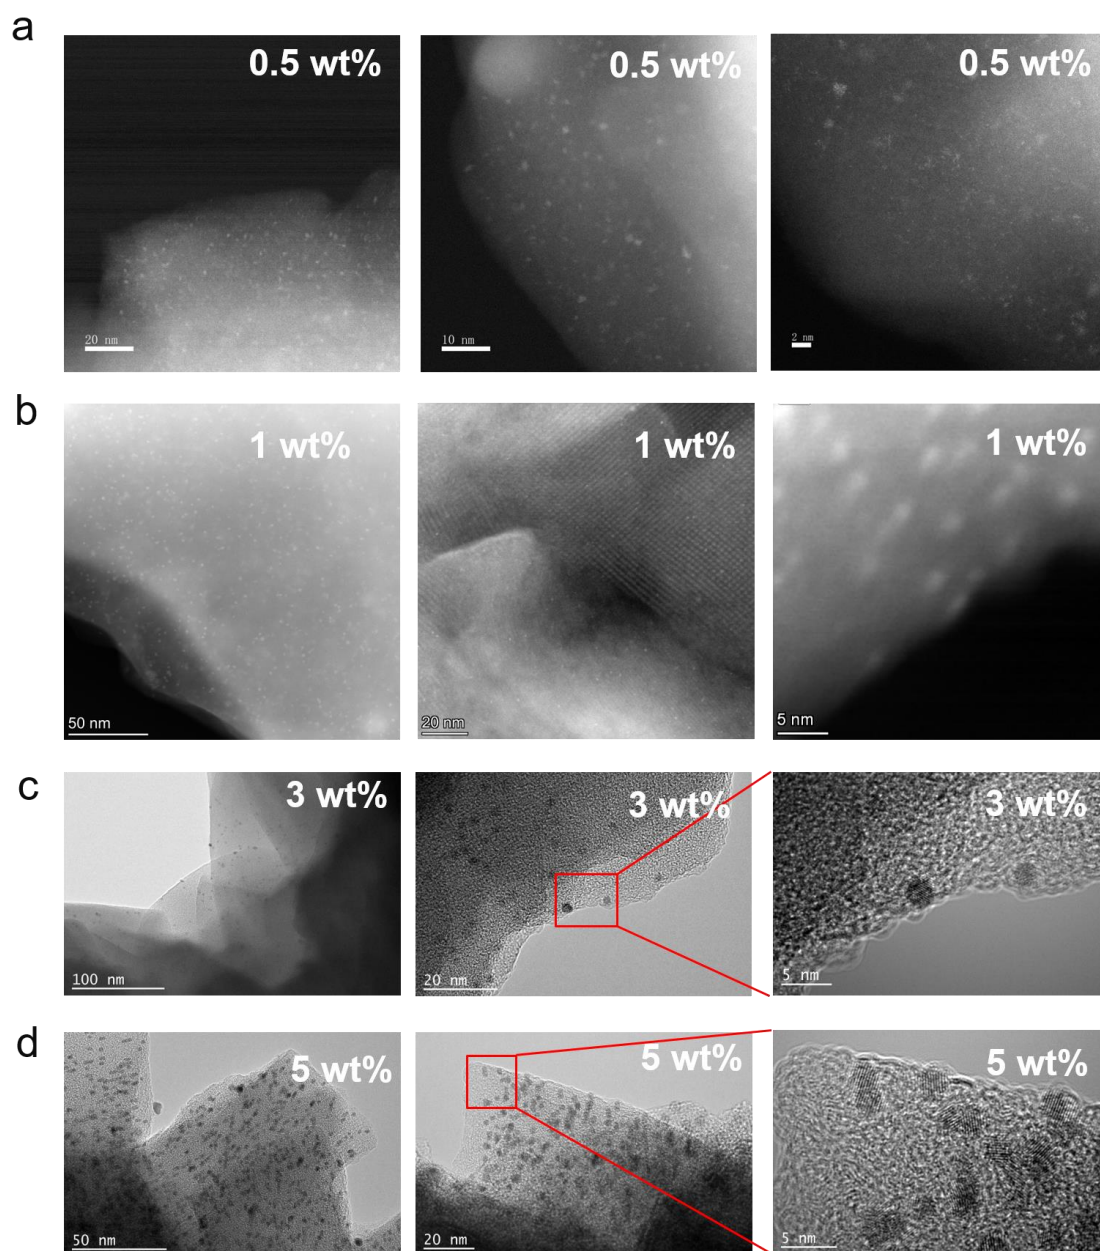

**Supplementary Figure 11.** HAADF-STEM and HR-TEM images of Pt-PY-DHBD-COF. (a) 0.5 wt% Pt loading. (b) 1 wt% Pt loading. (c) 3 wt% Pt loading. (d) 5 wt% Pt loading.



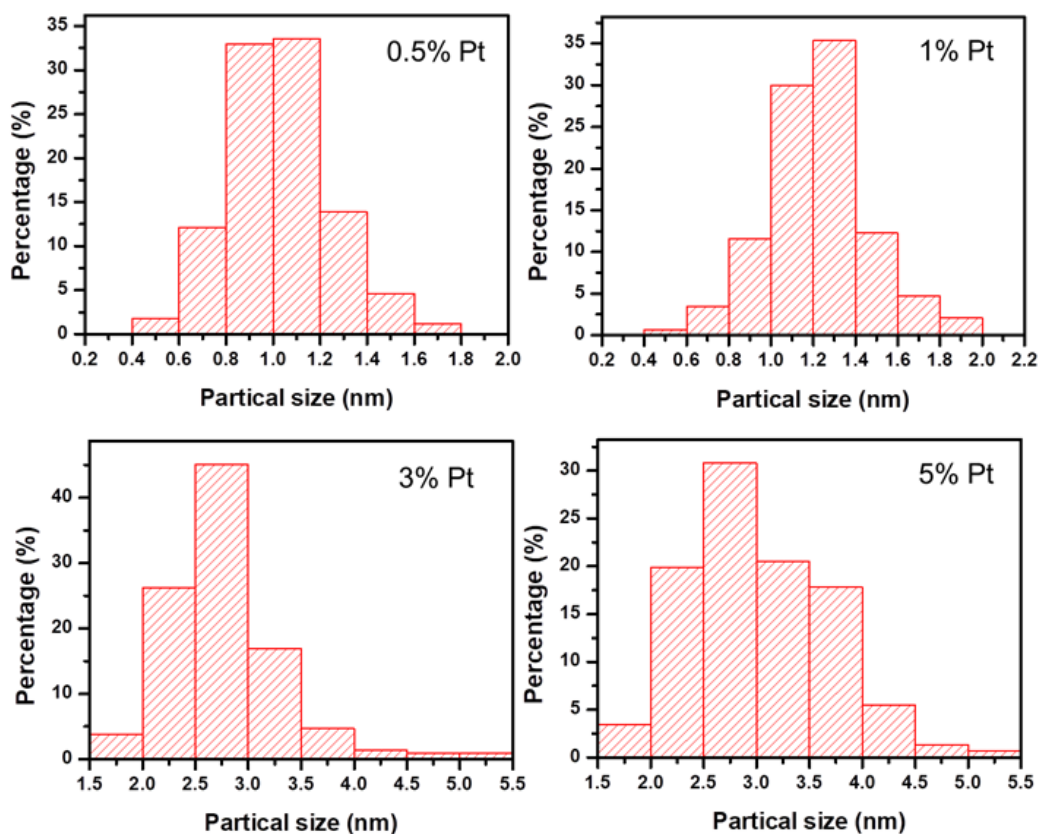

**Supplementary Figure 12.** The diameter distributions of Pt on PY-DHBD-COF with different Pt loading.

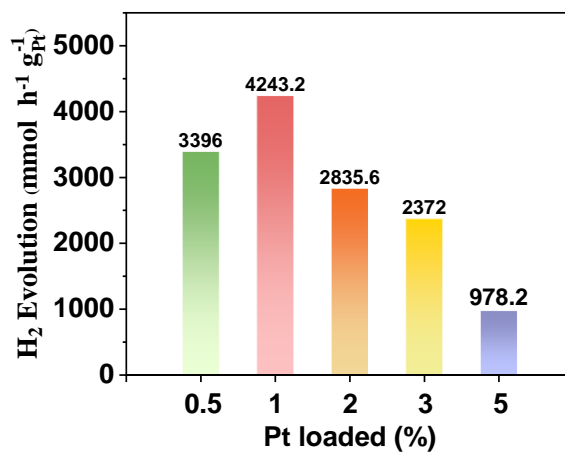

**Supplementary Figure 13.** HER activity normalized according to the loading amount of Pt.

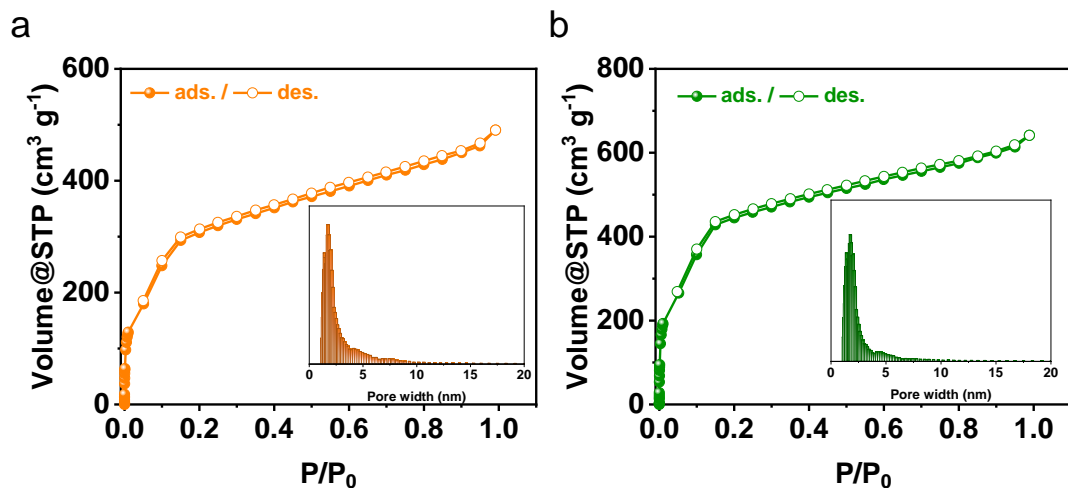

**Supplementary Figure 14.** N<sub>2</sub> adsorption isotherms of typical samples. (a) 1%wt Pt loaded PY-DHBD-COF. (b) Light-treated PY-DHBD-COF. PY-DHBD-COF was irradiated under the same photodeposition condition except for the existence of Pt precursor H<sub>2</sub>PtCl<sub>6</sub> in the solution.

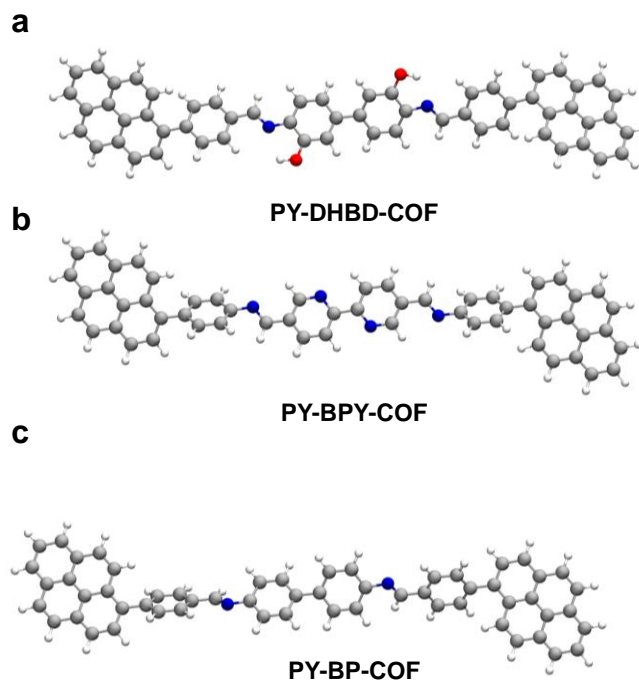

**Supplementary Figure 15.** The simplified COFs fragment model. (a) PY-DHBD-COF. (b) PY-BPY-COF. (c) PY-BP-COF.

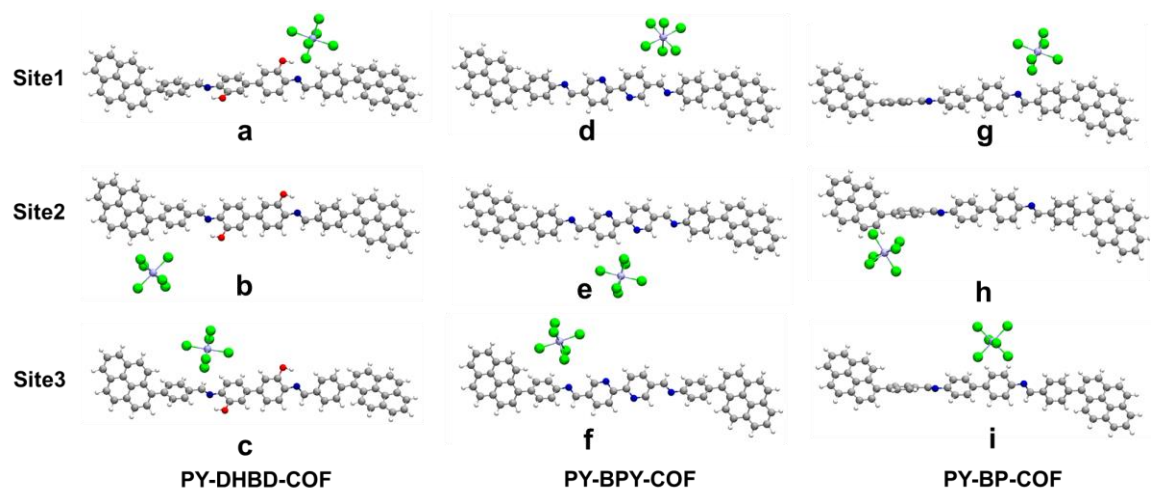

**Supplementary Figure 16.** The optimized configurations of  $\text{PtCl}_6^{2-}$  on COFs. (a-c) PY-DHBD-COF, (d-f) PY-BPY-COF and (g-i) PY-BP-COF.

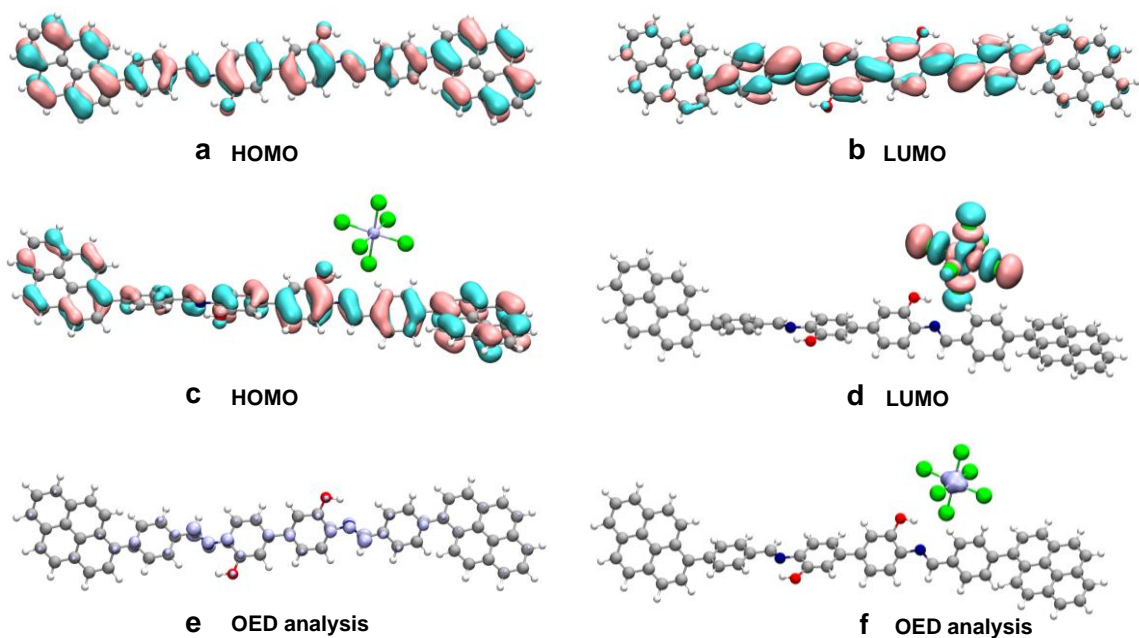

**Supplementary Figure 17.** The orbital and odd electron density analysis. The HOMO and LUMO orbital distribution on the fragment of PY-DHBD-COF (a and b) and the complex PY-DHBD-COF- $\text{PtCl}_6^{2-}$  (c and d). The odd electron density analysis based on the TD-DFT calculation of PY-DHBD-COF (e) and the complex PY-DHBD-COF- $\text{PtCl}_6^{2-}$  (f).

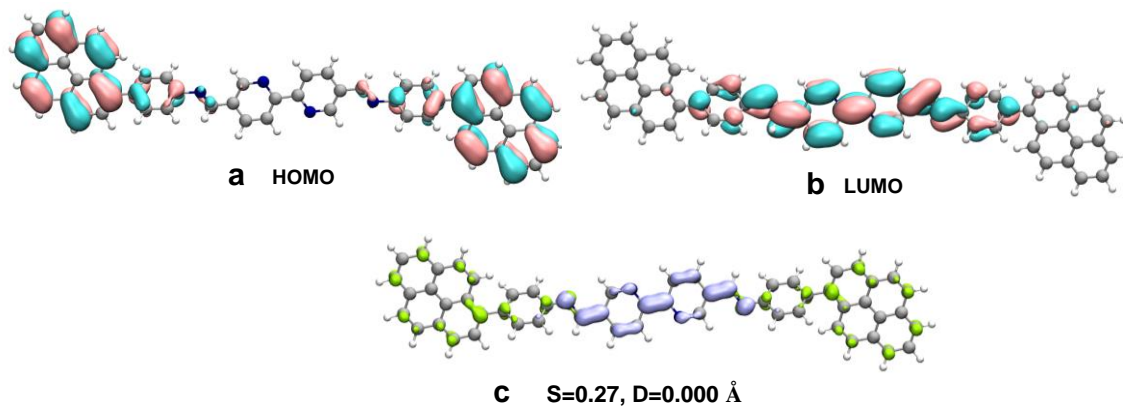

**Supplementary Figure 18.** The orbital and hole-electron analysis of PY-BPY-COF. The HOMO (a) and LUMO (b) orbital distribution on the construction fragment of PY-BPY-COF. (c) The hole (lime) and electron (violet) distribution of S1 excited state on PY-BPY-COF. S is the overlap integral of hole-electron distribution and D means the distance between centroid of hole and electron.

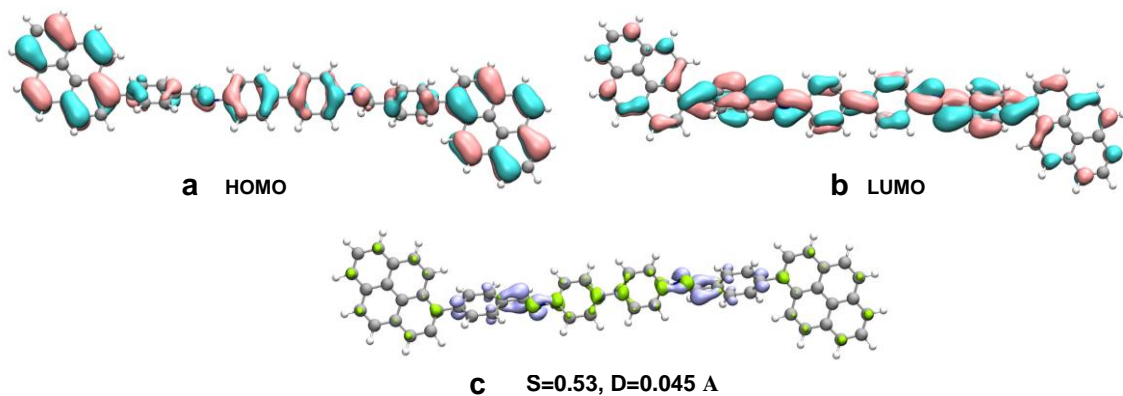

**Supplementary Figure 19.** The orbital and hole-electron analysis of PY-BP-COF. The HOMO (a) and LUMO (b) orbital distribution on the construction fragment of PY-BP-COF. (c) The hole (lime) and electron (violet) distribution of S1 excited state on PY-BP-COF. S is the overlap integral of hole-electron distribution and D means the distance between centroid of hole and electron.

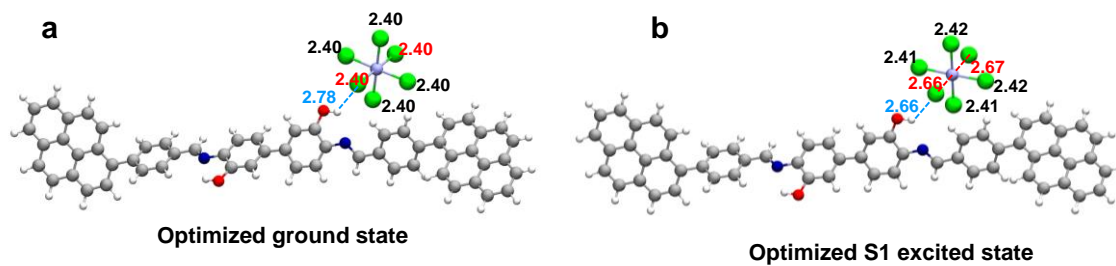

**Supplementary Figure 20.** The full optimized configurations of PY-DHBD-COF-PtCl<sub>6</sub><sup>2-</sup> under different states. (a) Ground state. (b) S1 excited state.

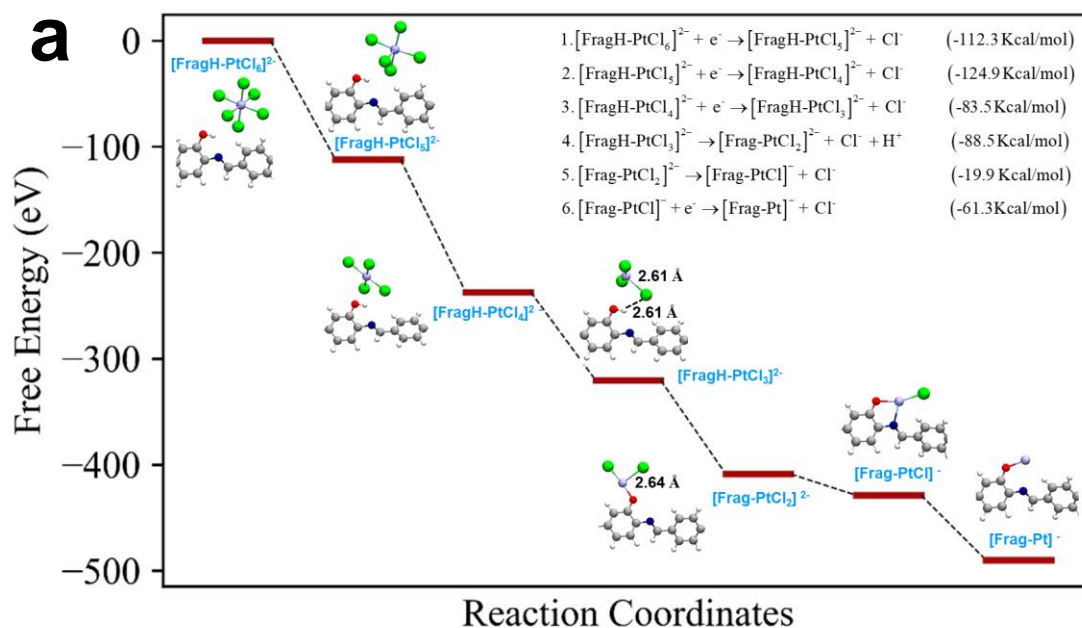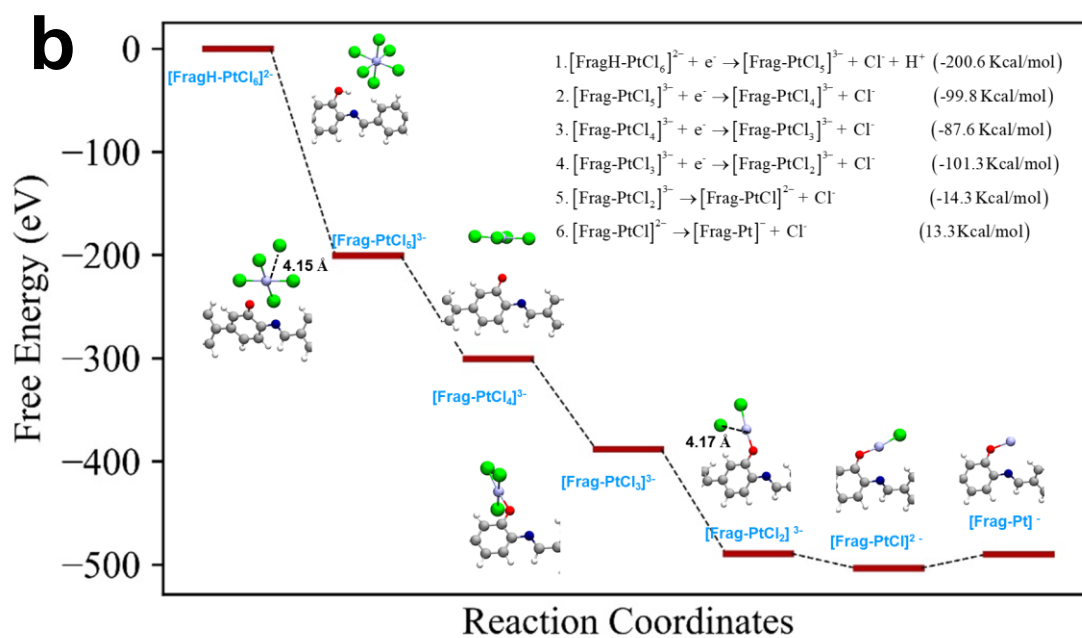

**Supplementary Figure 21** Free energy diagrams of two possible photodeposition reaction paths. (a) The hydroxyls are deprotonated at the fourth step, (b) the hydroxyls are deprotonated at the first step.

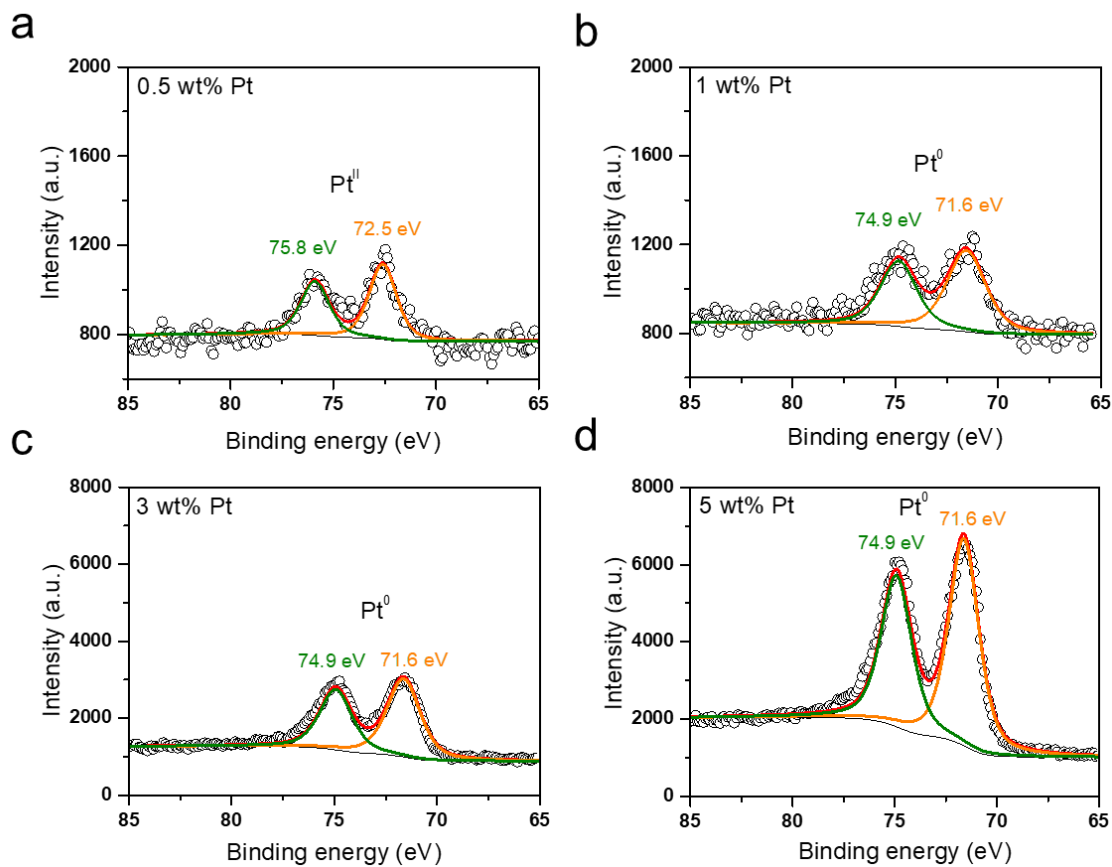

**Supplementary Figure 22.** XPS spectra of Pt 4f in PY-DHBD-COF with different Pt loading amounts. (a) 0.5 wt% Pt loading. (b) 1 wt% Pt loading. (c) 3 wt% Pt loading. (d) 5 wt% Pt loading.

**Supplementary Table 1.** Stacking distance and stacking energy for different periodic PY-DHBD-COF stacking models.

| Stacking models | Stacking distance (Å) | Total staking Energy (Kcal/mol) | vdW stacking Energy (Kcal/mol) |
|-----------------|-----------------------|---------------------------------|--------------------------------|
| Idealized       | 3.82                  | -309.6                          | -306.3                         |
| Flipped         | 3.97                  | -287.8                          | -284.6                         |
| Slipped-1       | 3.83                  | -304.9                          | -301.6                         |
| Slipped-2       | 3.89                  | -300.0                          | -296.6                         |

**Supplementary Table 2.** Long-term hydrogen production for 3 wt% Pt loaded PY-DHBD-COF.

| Term 1   |                                                    | Term 2   |                                                    | Term 3   |                                                    |
|----------|----------------------------------------------------|----------|----------------------------------------------------|----------|----------------------------------------------------|
| Time (h) | H <sub>2</sub> Envoluation (mmol g <sup>-1</sup> ) | Time (h) | H <sub>2</sub> Envoluation (mmol g <sup>-1</sup> ) | Time (h) | H <sub>2</sub> Envoluation (mmol g <sup>-1</sup> ) |
| 0.0      | 0.0                                                | 7.5      | 0.0                                                | 12.5     | 0.0                                                |
| 0.5      | 52.1                                               | 8.0      | 51.5                                               | 13.0     | 57.9                                               |
| 1.0      | 76.0                                               | 8.5      | 78.4                                               | 13.5     | 90.9                                               |
| 1.5      | 87.5                                               | 9.0      | 104.3                                              | 14.0     | 120.2                                              |
| 2.0      | 106.3                                              | 9.5      | 128.6                                              | 14.5     | 147.6                                              |
| 2.5      | 120.8                                              | 10.0     | 151.7                                              | 15.0     | 172.1                                              |
| 3.0      | 134.3                                              | 10.5     | 172.3                                              | 15.5     | 194.8                                              |
| 3.5      | 146.9                                              | 11.0     | 191.3                                              | 16.0     | 210.2                                              |
| 4.0      | 158.6                                              | 11.5     | 206.3                                              | 16.5     | 218.9                                              |
| 4.5      | 169.4                                              | 12.0     | 211.6                                              | 17.0     | 219.7                                              |
| 5.0      | 178.6                                              | 12.5     | 211.7                                              | 17.5     | 216.2                                              |
| 5.5      | 187.8                                              |          |                                                    |          |                                                    |
| 6.0      | 195.6                                              |          |                                                    |          |                                                    |
| 6.5      | 203.0                                              |          |                                                    |          |                                                    |
| 7.0      | 210.2                                              |          |                                                    |          |                                                    |
| 7.5      | 215.7                                              |          |                                                    |          |                                                    |

| Term 4 | Term 5 | Term 6 |
|--------|--------|--------|
|--------|--------|--------|



| Time (h) | H <sub>2</sub> Envoluation (mmol g <sup>-1</sup> ) | Time (h) | H <sub>2</sub> Envoluation (mmol g <sup>-1</sup> ) | Time (h) | H <sub>2</sub> Envoluation (mmol g <sup>-1</sup> ) |
|----------|----------------------------------------------------|----------|----------------------------------------------------|----------|----------------------------------------------------|
| 17.5     | 0.0                                                | 22.5     | 0.0                                                | 27.5     | 0.0                                                |
| 18.0     | 60.3                                               | 23.0     | 57.0                                               | 28.0     | 54.4                                               |
| 18.5     | 90.3                                               | 23.5     | 92.4                                               | 28.5     | 84.7                                               |
| 19.0     | 120.1                                              | 24.0     | 121.8                                              | 29.0     | 111.3                                              |
| 19.5     | 146.8                                              | 24.5     | 148.4                                              | 29.5     | 135.1                                              |
| 20.0     | 172.0                                              | 25.0     | 171.1                                              | 30.0     | 153.0                                              |
| 20.5     | 193.0                                              | 25.5     | 191.1                                              | 30.5     | 175.8                                              |
| 21.0     | 212.8                                              | 26.0     | 209.1                                              | 31.0     | 188.5                                              |
| 21.5     | 225.5                                              | 26.5     | 222.6                                              | 31.5     | 212.2                                              |
| 22.0     | 227.0                                              | 27.0     | 221.6                                              | 32.0     | 212.3                                              |
| 22.5     | 226.2                                              | 27.5     | 221.2                                              | 32.5     | 212.4                                              |

| Term 7   |                                                    | Term 8   |                                                    | Term 9   |                                                    |
|----------|----------------------------------------------------|----------|----------------------------------------------------|----------|----------------------------------------------------|
| Time (h) | H <sub>2</sub> Envoluation (mmol g <sup>-1</sup> ) | Time (h) | H <sub>2</sub> Envoluation (mmol g <sup>-1</sup> ) | Time (h) | H <sub>2</sub> Envoluation (mmol g <sup>-1</sup> ) |
| 32.5     | 0.0                                                | 37.5     | 0.0                                                | 42.5     | 0.0                                                |
| 33.0     | 55.9                                               | 38.0     | 52.5                                               | 43.0     | 48.3                                               |
| 33.5     | 90.6                                               | 38.5     | 81.4                                               | 43.5     | 74.7                                               |
| 34.0     | 122.5                                              | 39.0     | 117.4                                              | 44.0     | 100.2                                              |
| 34.5     | 148.3                                              | 39.5     | 138.6                                              | 44.5     | 124.0                                              |
| 35.0     | 171.3                                              | 40.0     | 157.1                                              | 45.0     | 146.4                                              |
| 35.5     | 190.5                                              | 40.5     | 174.9                                              | 45.5     | 166.4                                              |
| 36.0     | 202.3                                              | 41.0     | 188.2                                              | 46.0     | 186.2                                              |
| 36.5     | 207.0                                              | 41.5     | 210.0                                              | 46.5     | 203.3                                              |
| 37.0     | 207.7                                              | 42.0     | 216.0                                              | 47.0     | 206.5                                              |
| 37.5     | 207.9                                              | 42.5     | 216.1                                              | 47.5     | 207.3                                              |

| Term 10 |                            | Term 11 |                            | Term 12 |                            |
|---------|----------------------------|---------|----------------------------|---------|----------------------------|
| Time    | H <sub>2</sub> Envoluation | Time    | H <sub>2</sub> Envoluation | Time    | H <sub>2</sub> Envoluation |

|      |                         |      |                         |      |                         |
|------|-------------------------|------|-------------------------|------|-------------------------|
| (h)  | (mmol g <sup>-1</sup> ) | (h)  | (mmol g <sup>-1</sup> ) | (h)  | (mmol g <sup>-1</sup> ) |
| 47.5 | 0.0                     | 52.5 | 0.0                     | 57.5 | 0.0                     |
| 48.0 | 50.9                    | 53.0 | 59.2                    | 58.0 | 50.9                    |
| 48.5 | 80.2                    | 53.5 | 81.8                    | 58.5 | 80.2                    |
| 49.0 | 105.7                   | 54.0 | 103.8                   | 59.0 | 106.7                   |
| 49.5 | 130.4                   | 54.5 | 127.0                   | 59.5 | 130.4                   |
| 50.0 | 147.9                   | 55.0 | 144.2                   | 60.0 | 147.9                   |
| 50.5 | 166.0                   | 55.5 | 161.2                   | 60.5 | 166.1                   |
| 51.0 | 188.1                   | 56.0 | 176.7                   | 61.0 | 188.1                   |
| 51.5 | 197.3                   | 56.5 | 191.8                   | 61.5 | 197.4                   |
| 52.0 | 199.0                   | 57.0 | 213.7                   | 62.0 | 199.0                   |
| 52.5 | 206.5                   | 57.5 | 214.6                   | 62.5 | 206.5                   |

**Supplementary Table 3.** Porosity parameters of PY-DHBD-COF and 1wt%-Pt-PY-DHBD-COF.

| Samples                                              | Surface area (m <sup>2</sup> g <sup>-1</sup> ) | Pore volume (cm <sup>3</sup> g <sup>-1</sup> ) |
|------------------------------------------------------|------------------------------------------------|------------------------------------------------|
| <sup>a</sup> PY-DHBD-COF <sub>(original)</sub>       | 1893                                           | 0.918                                          |
| <sup>b</sup> PY-DHBD-COF <sub>(light-treated)</sub>  | 1603                                           | 0.874                                          |
| <sup>c</sup> 1wt%-Pt-PY-DHBD-COF                     | 1106                                           | 0.663                                          |
| <sup>d</sup> 3wt%-Pt-PY-DHBD-COF <sub>(before)</sub> | 900                                            | 0.568                                          |
| <sup>e</sup> 3wt%-Pt-PY-DHBD-COF <sub>(after)</sub>  | 571.4                                          | 0.416                                          |

<sup>a</sup> PY-DHBD-COF sample was the original material without any treatment.

<sup>b</sup> The PY-DHBD-COF<sub>(light-treated)</sub> sample was treated under a photodeposition condition (10 mg sample in 100 mL water, 10 mM ascorbic acid, 300 W Xe lamp,  $\lambda > 420$  nm, light irradiation for 1.5 h) except for the existence of Pt precursor H<sub>2</sub>PtCl<sub>6</sub> in the solution.

<sup>c,d</sup> The 1wt%-Pt-PY-DHBD-COF and 3wt%-Pt-PY-DHBD-COF<sub>(before)</sub> were obtained under the photodeposition condition (10 mg catalyst in 100 mL water, 10 mM ascorbic acid, H<sub>2</sub>PtCl<sub>6</sub> (0.376 g Pt L<sup>-1</sup>) as precursor, 300 W Xe lamp,  $\lambda > 420$  nm, light irradiation for 1.5 h).

<sup>e</sup> The 3wt%-Pt-PY-DHBD-COF<sub>(after)</sub> was the sample recovered after the long-term hydrogen evolution of 60 h.

**Supplementary Table 4.** The photocatalytic hydrogen evolution performance comparison of PY-DHBD-COF with other representative COF and MOF based photocatalysts.

| Entry                                 | Co-catalyst | Sacrificial reagent | Light Source | HER ( $\mu\text{mol g}^{-1} \text{h}^{-1}$ ) | AQY (at 420 nm) (%) | Ref.      |
|---------------------------------------|-------------|---------------------|--------------|----------------------------------------------|---------------------|-----------|
| PY-DHBD-COF                           | Pt 0.5wt%   | Ascorbic acid       | > 420 nm     | 16980                                        | --                  | This work |
| PY-DHBD-COF                           | Pt 1wt%     | Ascorbic acid       | > 420 nm     | 42432                                        | --                  | This work |
| PY-DHBD-COF                           | Pt 2wt%     | Ascorbic acid       | > 420 nm     | 56712                                        | --                  | This work |
| PY-DHBD-COF                           | Pt 3wt%     | Ascorbic acid       | > 420 nm     | 71160                                        | 8.4                 | This work |
| PY-DHBD-COF                           | Pt 5wt%     | Ascorbic acid       | > 420 nm     | 48912                                        | --                  | This work |
| Tp-2C/BPy <sup>2+</sup> -COF (19.10%) | Pt 3wt%     | Ascorbic acid       | > 420 nm     | 34600                                        | 6.93                | 3         |
| Py-CITP-BT-COF                        | Pt 5wt%     | Ascorbic acid       | > 420 nm     | 8875                                         | 8.45                | 4         |
| FS-COF                                | Pt 8wt%     | Ascorbic acid       | > 420 nm     | 10100                                        | 3.2                 | 5         |
| g-C <sub>18</sub> N <sub>3</sub> -COF | Pt 3wt%     | Ascorbic acid       | > 420 nm     | 2920                                         | 4.84                | 6         |
| MIL-125/Au                            | Pt 0.49wt%  | TEOA                | > 420 nm     | 1743                                         | --                  | 7         |
| Uio-66-NH <sub>2</sub>                | Pt 0.65wt%  | Ascorbic acid       | > 420 nm     | 1528                                         | 2.3                 | 8         |
| MIL-125-NH <sub>2</sub>               | Pt 0.45wt%  | TEOA                | > 420 nm     | 707                                          |                     | 9         |
| NU-100                                | Pt 1wt%     | TEOA                | > 400 nm     | 610                                          | --                  | 10        |

**Supplementary Table 5.** Adsorption energy ( $\Delta E_{\text{ads}}$ ) of  $\text{PtCl}_6^{2-}$  on COFs.

| COFs        | Configurations | $\Delta E_{\text{ads}}$ (Kcal/mol) |
|-------------|----------------|------------------------------------|
| PY-DHBD-COF | Site1          | -8.96                              |
|             | Site2          | -5.25                              |
|             | Site3          | -8.15                              |
| PY-BPY-COF  | Site1          | -6.72                              |
|             | Site2          | -5.41                              |
|             | Site3          | -6.17                              |
| PY-BP-COF   | Site1          | -5.83                              |
|             | Site2          | -5.40                              |
|             | Site3          | -5.27                              |

**Supplementary Table 6.** Vertical excitation energies for the PY-DHBD-COF.

| Excitation | Excitation Energy (nm) | Oscillator Strength (a.u.) | Occupied Orbital | Virtual Orbital | $2 \times  \text{coeff.} ^2 \times 100$ (%) |
|------------|------------------------|----------------------------|------------------|-----------------|---------------------------------------------|
| S0-S1      | 580.14                 | 3.8353                     | HOMO             | LUMO            | 91.68                                       |
| S0-S2      | 498.70                 | 0.0065                     | HOMO-1           | LUMO            | 83.52                                       |
| S0-S3      | 477.03                 | 0.0024                     | HOMO             | LUMO+1          | 83.62                                       |
| S0-S4      | 438.07                 | 0.1863                     | HOMO-1           | LUMO+1          | 69.79                                       |
| S0-S5      | 435.73                 | 0.2564                     | HOMO-2           | LUMO            | 67.13                                       |

**Supplementary Table 7.** Vertical excitation energies for the PY-BPY-COF.

| Excitation | Excitation Energy (nm) | Oscillator Strength (a.u.) | Occupied Orbital | Virtual Orbital | $2^* \text{coeff.} ^2 *100$ (%) |
|------------|------------------------|----------------------------|------------------|-----------------|---------------------------------|
| S0-S1      | 454.46                 | 1.3234                     | HOMO             | LUMO            | 90.15                           |
| S0-S2      | 441.60                 | 0.0000                     | HOMO-1           | LUMO            | 96.02                           |
| S0-S3      | 380.06                 | 1.7055                     | HOMO-2           | LUMO            | 74.07                           |
| S0-S4      | 362.85                 | 0.0000                     | HOMO             | LUMO+1          | 52.83                           |
| S0-S5      | 353.69                 | 0.4774                     | HOMO-1           | LUMO+1          | 58.31                           |

**Supplementary Table 8.** Vertical excitation energies for the PY-BP-COF.

| Excitation | Excitation Energy (nm) | Oscillator Strength (a.u.) | Occupied Orbital | Virtual Orbital | $2^* \text{coeff.} ^2 *100$ (%) |
|------------|------------------------|----------------------------|------------------|-----------------|---------------------------------|
| S0-S1      | 411.58                 | 2.8802                     | HOMO             | LUMO            | 71.04                           |
| S0-S2      | 390.87                 | 0.0064                     | HOMO-1           | LUMO            | 64.01                           |
| S0-S3      | 367.29                 | 0.1342                     | HOMO-2           | LUMO            | 71.57                           |
| S0-S4      | 361.22                 | 0.0038                     | HOMO             | LUMO+1          | 48.22                           |
| S0-S5      | 349.53                 | 0.2295                     | HOMO-1           | LUMO+1          | 67.93                           |

**Supplementary Table 9.** The electron energies<sup>1</sup>, zero point energy, entropies<sup>2</sup> and free energies<sup>3</sup> of all species in this work.

| COFs               | Complex                                                | $E_{ele}$<br>(Hartree) | ZPE<br>(Hartree) | S<br>(Cal/mol-K) | G<br>(Hartree) |
|--------------------|--------------------------------------------------------|------------------------|------------------|------------------|----------------|
| <b>PY-DHBD-COF</b> | FragH                                                  | -2491.985653           | 0.772007         | 281.147          | -2491.300448   |
|                    | FragH-PtCl <sub>6</sub> -Site1                         | -5373.069177           | 0.780492         | 347.342          | -5372.393677   |
|                    | FragH-PtCl <sub>6</sub> -Site2                         | -5373.063261           | 0.780483         | 351.005          | -5372.38941    |
|                    | FragH-PtCl <sub>6</sub> -Site3                         | -5373.06788            | 0.780807         | 348.983          | -5372.39284    |
|                    | FragH-PtCl <sub>6</sub> -Site1<br>-TD-OPT <sup>2</sup> | -5373.045082           | 0.780499         | 346.313          | -5372.362381   |
|                    | [FragH-PtCl <sub>5</sub> ] <sup>2-</sup>               | -4912.851211           | 0.778526         | 341.242          | -4912.17621    |
|                    | [FragH-PtCl <sub>4</sub> ] <sup>2-</sup>               | -4452.652669           | 0.777221         | 337.164          | -4451.978728   |
|                    | [FragH-PtCl <sub>3</sub> ] <sup>2-</sup>               | -3992.388356           | 0.775336         | 331.538          | -3991.71507    |
|                    | [Frag-PtCl <sub>2</sub> ] <sup>2-</sup>                | -3531.536765           | 0.762394         | 314.66           | -3530.87114    |
|                    | [Frag-PtCl] <sup>-</sup>                               | -3071.178655           | 0.762492         | 295.203          | -3070.506399   |
|                    | Frag-Pt                                                | -2610.877517           | 0.760441         | 292.796          | -2610.207632   |
|                    | [Frag-PtCl <sub>5</sub> ] <sup>3-</sup>                | -4912.384668           | 0.764739         | 353.142          | -4911.728436   |
|                    | [Frag-PtCl <sub>4</sub> ] <sup>3-</sup>                | -4452.152872           | 0.763782         | 333.556          | -4451.490956   |
|                    | [Frag-PtCl <sub>3</sub> ] <sup>3-</sup>                | -3991.897801           | 0.761105         | 318.787          | -3991.234046   |
|                    | [Frag-PtCl <sub>2</sub> ] <sup>3-</sup>                | -3531.661523           | 0.761857         | 320.86           | -3530.999065   |
|                    | [Frag-PtCl] <sup>2-</sup>                              | -3071.292944           | 0.761388         | 303.758          | -3070.625344   |
| <b>PY-BPY-COF</b>  | FragH                                                  | -2373.610474           | 0.739592         | 268.176          | -2372.953892   |
|                    | FragH-PtCl <sub>6</sub> -Site1                         | -5254.690428           | 0.74793          | 342.986          | -5254.04757    |
|                    | FragH-PtCl <sub>6</sub> -Site2                         | -5254.688343           | 0.747928         | 338.781          | -5254.043578   |
|                    | FragH-PtCl <sub>6</sub> -Site3                         | -5254.689549           | 0.747929         | 336.259          | -5254.043667   |
| <b>PY-BP-COF</b>   | FragH                                                  | -2341.533935           | 0.763474         | 267.153          | -2340.852832   |
|                    | FragH-PtCl <sub>6</sub> -Site1                         | -5222.612471           | 0.771582         | 339.928          | -5221.944321   |
|                    | FragH-PtCl <sub>6</sub> -Site2                         | -5222.61179            | 0.771548         | 340.73           | -5221.943832   |
|                    | FragH-PtCl <sub>6</sub> -Site3                         | -5222.611572           | 0.771864         | 340.471          | -5221.943698   |

<sup>1</sup> The electron energy, thermal correction to Gibbs free energy is calculated at the B3LYP-D3/6-31G\* (C, N, O, H, Cl) & SDD+ECP (Pt) level.

<sup>2</sup> The TD-DFT optimization is conducted at the TD-B3LYP-D3/6-31G\* (C, N, O, H, Cl) & SDD+ECP (Pt) level, and TD-DFT single point analysis is conducted at the TD-PBE0-D3/6-31G\* (C, N, O, H, Cl) & SDD+ECP (Pt) level

**Supplementary Table 10.** Fractional atomic coordinates for the unit cell of PY-DHBD-COF.

| Space group: C222                          |         |         |          |
|--------------------------------------------|---------|---------|----------|
| A = 39.9494 Å, b = 40.8391 Å, c = 3.8138 Å |         |         |          |
| $\alpha = \beta = \gamma = 90^\circ$       |         |         |          |
| Atom                                       | x       | y       | z        |
| C1                                         | 0.53076 | 0.42807 | -0.04262 |
| C2                                         | 0.53067 | 0.46500 | -0.01729 |
| C3                                         | 0.06044 | 0.98309 | 0.00352  |
| C4                                         | 0.56014 | 0.59113 | 0.11016  |
| C5                                         | 0.56359 | 0.62334 | -0.02418 |
| C6                                         | 0.58656 | 0.57926 | 0.31972  |
| C7                                         | 0.59231 | 0.64195 | 0.03934  |
| C8                                         | 0.61597 | 0.59716 | 0.36850  |
| C9                                         | 0.61919 | 0.62874 | 0.22955  |
| N10                                        | 0.65174 | 0.67775 | 0.17170  |
| C11                                        | 0.67929 | 0.69735 | 0.18291  |
| C12                                        | 0.21120 | 0.18542 | 0.27537  |
| C13                                        | 0.67598 | 0.73068 | 0.09068  |
| C14                                        | 0.23901 | 0.20608 | 0.27493  |
| C15                                        | 0.70385 | 0.75138 | 0.10097  |
| C16                                        | 0.73588 | 0.73951 | 0.19002  |
| H17                                        | 0.91539 | 0.97169 | -0.02786 |
| H18                                        | 0.54526 | 0.63392 | -0.19910 |
| H19                                        | 0.08436 | 0.05644 | 0.45837  |
| H20                                        | 0.59388 | 0.66618 | -0.07490 |
| H21                                        | 0.13579 | 0.08663 | 0.52651  |
| H22                                        | 0.26280 | 0.19586 | 0.35517  |
| O23                                        | 0.64533 | 0.74422 | -0.01280 |
| H24                                        | 0.70038 | 0.77658 | 0.02062  |
| C25                                        | 0.64887 | 0.64628 | 0.28199  |
| H26                                        | 0.21535 | 0.16008 | 0.34267  |
| H27                                        | 0.33089 | 0.63445 | -0.42118 |
| H28                                        | 0.37408 | 0.72831 | 0.02029  |
| C29                                        | 0.50000 | 0.41187 | 0.00000  |
| C30                                        | 0.50000 | 0.48240 | -0.00000 |
| H31                                        | 0.50000 | 0.38558 | 0.00000  |

**Supplementary Table 11.** Fractional atomic coordinates for the unit cell of PY-BPY-COF.

| Space group: P222                          |         |         |          |
|--------------------------------------------|---------|---------|----------|
| A = 36.9164 Å, b = 41.8713 Å, c = 3.9555 Å |         |         |          |
| $\alpha = \beta = \gamma = 90^\circ$       |         |         |          |
| Atom                                       | x       | y       | z        |
| C1                                         | 0.92294 | 0.97077 | -0.03352 |
| C2                                         | 0.96165 | 0.97097 | -0.01253 |
| C3                                         | 0.98154 | 0.94227 | 0.00083  |
| H4                                         | 0.96805 | 0.08105 | -0.01012 |
| C5                                         | 0.09841 | 0.94272 | 0.07938  |
| C6                                         | 0.13288 | 0.93925 | -0.08575 |
| C7                                         | 0.08783 | 0.91684 | 0.29622  |
| C8                                         | 0.15390 | 0.91249 | -0.04448 |
| H9                                         | 0.14247 | 0.95802 | -0.25873 |
| C10                                        | 0.10856 | 0.88977 | 0.32667  |
| H11                                        | 0.06267 | 0.91863 | 0.44388  |
| C12                                        | 0.14133 | 0.88797 | 0.15825  |
| H13                                        | 0.17972 | 0.91059 | -0.18053 |
| H14                                        | 0.10002 | 0.86987 | 0.48976  |
| N15                                        | 0.16094 | 0.86075 | 0.20165  |
| C16                                        | 0.19668 | 0.85479 | 0.08489  |
| H17                                        | 0.21311 | 0.87313 | -0.04195 |
| C18                                        | 0.21095 | 0.82302 | 0.14195  |
| C19                                        | 0.19092 | 0.79877 | 0.29843  |
| C20                                        | 0.24653 | 0.81521 | 0.03883  |
| C21                                        | 0.20600 | 0.76913 | 0.34174  |
| H22                                        | 0.16316 | 0.80293 | 0.38809  |
| N23                                        | 0.26223 | 0.78654 | 0.08286  |
| H24                                        | 0.26433 | 0.83246 | -0.08743 |
| C25                                        | 0.24191 | 0.76357 | 0.23078  |
| H26                                        | 0.19089 | 0.74974 | 0.46501  |
| C27                                        | 0.42310 | 0.47120 | -0.06195 |
| C28                                        | 0.46167 | 0.47111 | -0.02842 |
| C29                                        | 0.48157 | 0.44238 | -0.01084 |
| H30                                        | 0.46806 | 0.58096 | 0.01063  |
| C31                                        | 0.59774 | 0.44363 | 0.15048  |



|     |         |         |          |
|-----|---------|---------|----------|
| C32 | 0.63370 | 0.43859 | 0.02134  |
| C33 | 0.58412 | 0.41925 | 0.37100  |
| C34 | 0.65306 | 0.41145 | 0.09539  |
| H35 | 0.64576 | 0.45602 | -0.15356 |
| C36 | 0.60297 | 0.39160 | 0.43108  |
| H37 | 0.55749 | 0.42227 | 0.49038  |
| C38 | 0.63721 | 0.38821 | 0.29479  |
| H39 | 0.68011 | 0.40757 | -0.01292 |
| H40 | 0.59181 | 0.37262 | 0.59236  |
| N41 | 0.65495 | 0.36042 | 0.35729  |
| C42 | 0.69281 | 0.35733 | 0.40657  |
| H43 | 0.70985 | 0.37766 | 0.48296  |
| C44 | 0.70774 | 0.32567 | 0.35811  |
| C45 | 0.68738 | 0.30069 | 0.21933  |
| C46 | 0.74400 | 0.31865 | 0.44699  |
| N47 | 0.70301 | 0.27139 | 0.17108  |
| H48 | 0.65911 | 0.30418 | 0.14129  |
| C49 | 0.75995 | 0.29000 | 0.40638  |
| H50 | 0.76205 | 0.33648 | 0.56030  |
| C51 | 0.73955 | 0.26660 | 0.26745  |
| H52 | 0.68767 | 0.74845 | 0.94138  |
| C53 | 0.90511 | 0.00000 | 0.00000  |
| C54 | 0.98105 | 0.00000 | 0.00000  |
| H55 | 0.87534 | 0.00000 | 0.00000  |
| C56 | 0.40520 | 0.50000 | 0.00000  |
| C57 | 0.48107 | 0.50000 | 0.00000  |
| H58 | 0.37546 | 0.50000 | 0.00000  |

## Section II: Supplementary methods

### 1. Materials and methods

All reagents, unless otherwise noted, were purchased from commercial sources and used without further purification. n-Butanol (n-BuOH), o-dichlorobenzene (o-DCB), and acetic acid were dried through the standard procedures. Acetone, methanol, tetrahydrofuran and aqueous acetic were bought from Aladdin Reagent. 1,4-dihydroxybenzidine, 1,3,6,8-Tetra(4-formylphenyl)pyrene, 2,2'-bipyridine-5,5'-dicarbaldehyde and 4,4',4'',4'''-(pyrene-1,3,6,8-tetrayl)tetraaniline was bought from Jilin Chinese Academy of Sciences-Yanshen Technology.

The Brunauer-Emmett-Teller (BET) surface areas of COFs were measured at 77 K by using a Quantachrome Automated Surface Area & Pore Size Analyzer. Pore size distributions was estimated by nonlocal density functional theory (NLDFT). The powder X-ray diffraction (PXRD) pattern was recorded on a Cu-K $\alpha$  X-ray radiation source ( $\lambda=0.154056$  nm) incident radiation by a Rigaku MiniFIEX 600 instrument over the range of  $2\theta = 2.0\sim 40.0^\circ$  with a step size of  $0.02^\circ$  per step. The FT-IR spectra were recorded by Thermo Nicolet iS50 in the range from 400 to 4000  $\text{cm}^{-1}$ . Solid-state  $^{13}\text{C}$  CP/MAS NMR spectra were recorded on 400WB S2 AVANCE III (Bruker, Switzerland) plus 400 MHz spectrophotometer at 298 K. Morphological information for COFs were obtained from field-emission scanning electron microscope (SEM, FEI Nano 450), transmission electron microscopy (TEM, JEOL jem 2100f) and high-angle annular dark-field scanning transmission electron microscope (HAADF-STEM, FEI Themis Z). The X-ray photoelectron spectroscopic (XPS) was obtained from an ESCALAB 250 with a monochromatic Al K $\alpha$  X-ray source. Thermogravimetric analyses (TGA) was recorded on a Netzsch Model STA 449C microanalyzer heated from 25  $^\circ\text{C}$  to 900  $^\circ\text{C}$  in nitrogen atmosphere. UV-visible absorption spectra of the polymers were measured on a Shimadzu UV-2550 UV-vis spectrometer by measuring the reflectance of powders in the solid state. High-resolution valence band ultraviolet photoelectron spectra (UPS) were obtained from Thermo Fisher Scientific Escalab 250Xi. Fluorescence spectrum and fluorescence lifetime were measured using a FLS1000 Edinburgh Instruments spectrofluorimeter. The Photocatalytic hydrogen evolution measurements were carried out in a Pyrex top-irradiation reaction vessel connected to a glass closed Labsolar 6A gas circulation system (Perfect Light) and gas products were analyzed by online 8890 GC System (Agilent) referencing against standard gas with a known concentration of hydrogen. The light intensities of high precision illuminator system LX300f were tested by the PM100D optical power meter (Tech Support). The electrochemical measurements were recorded on the NOVA II electrochemical workstation with a standard three-electrode system with the photocatalyst-coated FTO as the

working electrode, Pt plate as the counter electrode and the Ag/AgCl electrode as a reference electrode.

### **Photocatalytic hydrogen evolution measurement**

The photocatalytic hydrogen evolution measurements were carried out in a Pyrex top irradiation reaction vessel connected to a glass closed gas circulation system (Labsolar 6A, Perfect Light). For each reaction, it was conducted using 10 mg photocatalyst, 100 mL H<sub>2</sub>O and 176 mg ascorbic acid as sacrificial agent, and the mixture was dispersed by ultrasonication for 30 minutes to obtain a uniform dispersion. After that, appropriate H<sub>2</sub>PtCl<sub>6</sub> aqueous solution (0.376 g Pt L<sup>-1</sup>) was added into the solution system. Then the samples were added into a quartz transparent photoreactor. The above suspension was bubbled with Argon for 30 minutes, and was kept at 20 °C using circulating water. The Xenon lamp was turned on to start the photocatalysis measurements. Besides, the reaction solution was constantly stirred to maintain the entire mixture homogeneous. Hydrogen dissolved in the reaction mixture was not measured and the pressure increase generated by the evolved hydrogen was neglected in the calculations. The hydrogen evolution rates were determined from a linear regression fit. After the photocatalysis experiment, the photocatalysts were recovered by washing with water and acetone then dried at 120 °C vacuum oven.

### **Long-term photocatalytic experiment**

The long-term photocatalytic hydrogen evolution measurements were carried out in a same system as the photocatalytic hydrogen evolution measurements. It was conducted using 10 mg PY-DHBD-COF, 100 mL H<sub>2</sub>O and 352 mg ascorbic acid as sacrificial agent, and the mixture was dispersed by ultrasonication for 30 minutes to obtain a uniform dispersion. After that, 3 wt% Pt (795 μL 0.376 g Pt L<sup>-1</sup> H<sub>2</sub>PtCl<sub>6</sub> aqueous solution) was added into the solution system. During the long-term experiment, 352 mg ascorbic acid was added for eleven times only when the amount of hydrogen no longer increased.

### **Apparent quantum yield (AQY) measurement**

The AQY measurement was conducted in the same reaction system as other photocatalytic reactions, otherwise the xenon lamp was equipped with a band-pass filter with central wavelength of 420 nm and full-width at half-maximum (FWHM) of ~10 nm. The number of photons reaching the solution was measured using a calibrated Si photodiode. For full absorption of the incident photons, 50 mg 3% Pt-PY-DHBD-COF was used as photocatalyst in the AQY measurement. The AQY value was calculated according to the following equation:

$$AQY(\%) = (2R(H_2) / I) \times 100 \quad (S1)$$

where  $R(H_2)$  and  $I$  denote the evolution rate of H<sub>2</sub> in the initial one hour irradiation and the number of photons reaching the surface of the reaction solution per hour, respectively. The

total number of incident photons per hour were measured to be  $4.3 \times 10^{19} \text{ h}^{-1}$ . The  $\text{H}_2$  evolution rate was  $3 \mu\text{mol h}^{-1}$  ( this is  $1.806 \times 10^{18} \text{ h}^{-1}$ ).

### Photoelectrochemical measurements

There are two preparations before the test: Firstly, FTO glasses were firstly cleaned by sonication in ethanol for 30 min and dried under nitrogen flow. Secondly, the working electrodes were immersed in the electrolyte for 60 s before any measurements were taken. After that, the photocurrent-time (I-t) profiles, electrochemical impedance spectra (EIS), Mott-Schottky plot were recorded on the NOVA II electrochemical workstation with a standard three-electrode system with the photocatalyst-coated FTO as the working electrode, Pt plate as the counter electrode and the Ag/AgCl electrode as a reference electrode. A 0.2 M  $\text{Na}_2\text{SO}_4$  solution (pH = 2.5) was used as the electrolyte. A 300 W Xenon lamp with a 420 nm cut-off filter was used as the light source during the measurement. The applied potentials vs. Ag/AgCl is converted to RHE potentials using the following equation:

$$E_{\text{RHE}} = E_{\text{Ag/AgCl}} + 0.0591\text{pH} + E_{\text{Ag/AgCl}}^0 \quad (E_{\text{Ag/AgCl}}^0 = 0.199 \text{ V}) \quad (\text{S2})$$

### DFT calculations

Periodic structure calculations on the COF crystal structures were carried out within the UFF<sup>1</sup> force field using LAMMPS code<sup>2</sup> considering the staking structures is too time-consuming to be calculated with DFT method. The atom type of N, O, H and C is N\_R, O\_R, H\_ and C\_R as described in the UFF force field. Steepest descent method has been used to search the lowest energy configuration.

The hole and electron distribution are calculated with equation S3-S8 using the Multiwfn code:

$$\rho^{\text{hole}}(r) = \rho_{\text{loc}}^{\text{hole}}(r) + \rho_{\text{cross}}^{\text{hole}}(r) \quad (\text{S3}),$$

$$\rho_{\text{loc}}^{\text{hole}}(r) = \sum_{i \rightarrow a} (w_i^a)^2 \varphi_i \varphi_i - \sum_{i \leftarrow a} (w_i'^a)^2 \varphi_i \varphi_i \quad (\text{S4}),$$

$$\rho_{\text{cross}}^{\text{hole}}(r) = \sum_{i \rightarrow a} \sum_{j \neq i \rightarrow a} w_i^a w_j^a \varphi_i \varphi_j - \sum_{i \leftarrow a} \sum_{j \neq i \leftarrow a} w_i'^a w_j'^a \varphi_i \varphi_j \quad (\text{S5}),$$

$$\rho^{\text{ele}}(r) = \rho_{\text{loc}}^{\text{ele}}(r) + \rho_{\text{cross}}^{\text{ele}}(r) \quad (\text{S6}),$$

$$\rho_{\text{loc}}^{\text{ele}}(r) = \sum_{i \rightarrow a} (w_i^a)^2 \varphi_a \varphi_a - \sum_{i \leftarrow a} (w_i'^a)^2 \varphi_a \varphi_a \quad (\text{S7}),$$

$$\rho_{\text{cross}}^{\text{ele}}(r) = \sum_{i \rightarrow a} \sum_{i \rightarrow b \neq a} w_i^a w_i^b \varphi_a \varphi_b - \sum_{i \leftarrow a} \sum_{i \leftarrow b \neq a} w_i'^a w_i'^b \varphi_a \varphi_b \quad (\text{S8}),$$

where  $\rho^{\text{hole}}(r)$  and  $\rho^{\text{ele}}(r)$  stand for the density distribution of hole and electron, respectively,  $r$  is the distance,  $\varphi$  is the orbital wave function,  $\varphi_i$  or  $\varphi_j$  is the occupied orbital, and  $\varphi_a$  or  $\varphi_b$  is the unoccupied orbital, and  $w$  and  $w'$  correspond to configuration coefficient of excitation and

de-excitation, respectively. Therefore,  $i \rightarrow a$  represents excitation configuration,  $i \leftarrow a$  represents de excitation configuration. Hole distribution and electron distribution are divided into local term and cross term. The local term is generally dominant, reflecting the contribution of the configuration function itself, and the cross term can not be ignored, otherwise the quantification is inaccurate, which reflects the influence of the coupling between the configuration functions on the hole and electron distribution.

S and D indexes stand for the overlap integral of hole-electron distribution and the distance between centroid of hole and electron, respectively. The S and D are calculated with equations S9-S10 using Multiwfn code:

$$S = \int \min[\rho^{\text{hole}}(r), \rho^{\text{ele}}(r)] dr \quad (\text{S9}),$$

$$D = \sqrt{|X_{\text{ele}} - X_{\text{hole}}|^2 + |Y_{\text{ele}} - Y_{\text{hole}}|^2 + |Z_{\text{ele}} - Z_{\text{hole}}|^2} \quad (\text{S10}),$$

where  $\rho^{\text{hole}}(r)$  and  $\rho^{\text{ele}}(r)$  stand for the density distribution of hole and electron, respectively,  $X_{\text{hole}}$  refers to the X coordinate of centroid of hole, which can be obtained through multiplying the  $\rho^{\text{hole}}$  function by the x coordinate variable and integration in the whole space. The detailed settings and process can be found in part 4.18 "Electron excitation analysis" in the manual of Multiwfn code (Tian Lu, Multiwfn Manual, version 3.8, Section 4.18, available at [http://sobereva.com/multiwfn/misc/Multiwfn\\_3.8.pdf](http://sobereva.com/multiwfn/misc/Multiwfn_3.8.pdf)).

## 2. Synthetic procedures

**PY-DHBD-COF.** A n-butylalcohol (n-BuOH)/o-dichlorobenzene (o-DCB)/6 M AcOH (5/5/1 by vol.; 1.1 mL) mixture of 1,4-dihydroxybenzidine (0.04 mmol, 8.6 mg) and 1,3,6,8-tetraphenylpyrene (0.02 mmol, 12.3 mg) in a Pyrex tube (10 mL) was degassed by three freeze-pump-thaw cycles. The tube was sealed off and heated at 120 °C for 3 days. The precipitate was collected by centrifugation, and washed with anhydrous THF for 5 times and acetone twice. The powder was dried at 120 °C under vacuum overnight to give the PY-DHBD-COF in an isolated yield of 85%.

**PY-BPY-COF.** A n-butylalcohol (n-BuOH)/o-dichlorobenzene (o-DCB)/6 M AcOH (5/5/1 by vol.; 1.1 mL) mixture of 2,2'-bipyridine-5,5'-dicarbaldehyde (2,2'-BPY) (0.04 mmol, 8.5 mg) and 4,4',4'',4'''-(pyrene-1,3,6,8-tetrayl) tetraaniline (PY-NH<sub>2</sub>) (0.02 mmol, 11.3 mg) in a Pyrex tube (10 mL) was degassed by three freeze-pump-thaw cycles. The tube was sealed off and heated at 120 °C for 3 days. The precipitate was collected by centrifugation, and washed with anhydrous THF for 5 times and acetone twice. The powder was dried at 120 °C under vacuum overnight to give the PY-BPY-COF in an isolated yield of 82%.

## Supplementary References

1. Rappe, A. K., Casewit, C. J., Colwell, K. S., Goddard, W. A. & Skiff, W. M. UFF, a full periodic-table force-field for molecular mechanics and molecular-dynamics simulations. *J. Am. Chem. Soc.* **114**, 10024-10035 (1992).
2. "LAMMPS Molecular Dynamics Simulator". Sandia National Laboratories. Retrieved 2010-10-03.
3. Mi, Z. *et al.* Covalent organic frameworks enabling site isolation of viologen-derived electron-transfer mediators for stable photocatalytic hydrogen evolution. *Angew. Chem. Int. Ed.* **60**, 9642-9649 (2021).
4. Chen, W. *et al.* Modulating benzothiadiazole-based covalent organic frameworks via halogenation for enhanced photocatalytic water splitting. *Angew. Chem. Int. Ed.* **59**, 16902-16909 (2020).
5. Wang, X. *et al.* Sulfone-containing covalent organic frameworks for photocatalytic hydrogen evolution from water. *Nat. Chem.* **10**, 1180-1189 (2018).
6. Bi, S. *et al.* Two-dimensional semiconducting covalent organic frameworks via condensation at arylmethyl carbon atoms. *Nat. Commun.* **10**, 2467 (2019).
7. Xiao, J. D., Han, L., Luo, J., Yu, S. H. & Jiang, H. L. Integration of plasmonic effects and schottky junctions into metal-organic framework composites: steering charge flow for enhanced visible-light photocatalysis. *Angew. Chem. Int. Ed.* **57**, 1103-1107 (2018).
8. Chen, Y.-F. *et al.* Calix[4]arene based dye-sensitized Pt@UiO-66-NH<sub>2</sub> metal-organic framework for efficient visible-light photocatalytic hydrogen production. *Appl. Catal. B* **206**, 426-433 (2017).
9. Mohammadnezhad, F. *et al.* Tuning the optoelectronic properties of hybrid functionalized MIL-125-NH<sub>2</sub> for photocatalytic hydrogen evolution. *ACS Appl. Mater. Interfaces* **13**, 5044-5051 (2021).
10. Li, X. *et al.* BiOI particles confined into metal-organic framework NU-1000 for valid photocatalytic hydrogen evolution under visible-light irradiation. *Inorg. Chem.* **60**, 1352-1358 (2021).
