# Supplementary material for: In situ photodeposition of platinum clusters on a covalent organic framework for photocatalytic hydrogen production
Source: PubMed Central journal article supplement (PMC8924255; doi:10.1038/s41467-022-29076-z), 2022-03-15
Supplement: 41467_2022_29076_MOESM3_ESM.pdf [file 41467_2022_29076_MOESM3_ESM.pdf]

Description of Additional Supplementary Files

File name: Supplementary Data 1

Description: The relevant DFT optimized structures
